# Supplementary material
Source: PubMed Central journal article supplement (PMC11029347)
Supplement: 262_2013_1473_MOESM1_ESM.pdf [file 262_2013_1473_MOESM1_ESM.pdf]

# Cancer Immunology, Immunotherapy

Göthert et al.

## Supplementary tables

**Table S1. Patient characteristics.**

| <b>Parameters</b>                         | <b>No. of patients (%)</b> |
|-------------------------------------------|----------------------------|
| <i>Total number of patients</i>           | 105 (100)                  |
| <i>Male/ female</i>                       | 69/36 (66/34)              |
| <b>Binet stage (n=104)</b>                |                            |
| <i>A</i>                                  | 61 (59)                    |
| <i>B</i>                                  | 27 (26)                    |
| <i>C</i>                                  | 16 (15)                    |
| <b>CD38 expression (n=103)</b>            |                            |
| <i>positive</i>                           | 38 (37)                    |
| <i>negative</i>                           | 65 (63)                    |
| <b>Genomic aberrations by FISH (n=94)</b> |                            |
| <i>No</i>                                 | 21 (22)                    |
| <i>Deletion 13</i>                        | 51 (54)                    |
| <i>Deletion 11q</i>                       | 8 (9)                      |
| <i>Trisomy12</i>                          | 11 (12)                    |
| <i>Deletion 17p</i>                       | 3 (3)                      |
| <b>Treatment history</b>                  |                            |
| <i>treated</i>                            | 10 (9)                     |
| <i>untreated</i>                          | 95 (91)                    |

**Table S2. Correlations between peripheral blood cellular subset dynamics.**

|                    |                      | <i>lymphocytes</i> | <i>CD3</i>  | <i>CD4</i>  | <i>CD8</i>  | <i>NK</i>   |
|--------------------|----------------------|--------------------|-------------|-------------|-------------|-------------|
| <i>lymphocytes</i> | <i>r<sub>s</sub></i> | <b>1.00</b>        | 0.59        | 0.51        | 0.59        | 0.36        |
|                    | <i>P value</i>       |                    | <0.0001     | <0.0001     | <0.0001     | 0.048       |
| <i>CD3</i>         | <i>r<sub>s</sub></i> | 0.59               | <b>1.00</b> | 0.87        | 0.94        | 0.25        |
|                    | <i>P value</i>       | <0.0001            |             | <0.0001     | <0.0001     | 0.19        |
| <i>CD4</i>         | <i>r<sub>s</sub></i> | 0.51               | 0.87        | <b>1.00</b> | 0.80        | 0.25        |
|                    | <i>P value</i>       | <0.0001            | <0.0001     |             | <0.0001     | 0.18        |
| <i>CD8</i>         | <i>r<sub>s</sub></i> | 0.59               | 0.94        | 0.80        | <b>1.00</b> | 0.29        |
|                    | <i>P value</i>       | <0.0001            | <0.0001     | <0.0001     |             | 0.12        |
| <i>NK</i>          | <i>r<sub>s</sub></i> | 0.36               | 0.25        | 0.25        | 0.29        | <b>1.00</b> |
|                    | <i>P value</i>       | 0.048              | 0.19        | 0.18        | 0.12        |             |

Individual patient cellular subset dynamics were determined as cellular increments/  $\mu$ l per month as outlined in Figure 1A. The calculations of Spearman correlation coefficients ( $r_s$ ) included n=46 CLL patients.

**Table S3. Differentially expressed probes of CLL vs. Normal donor derived CD3-purified T-cell samples.**

| Gene ID  | Affymetrix ID | Fold Change |
|----------|---------------|-------------|
| TCF4     | 213891_s_at   | 7,42        |
| IGHM     | 212827_at     | 4,29        |
| IGHM     | 209374_s_at   | 4,93        |
| C13orf18 | 219471_at     | 6,87        |
| TCF4     | 212386_at     | 6,93        |
| FCGR2B   | 210889_s_at   | 3,45        |
| TCF4     | 203753_at     | 4,99        |
| HLA-DQA1 | 203290_at     | 7,67        |
| HLA-DRB1 | 215193_x_at   | 2,39        |
| HLA-DRA  | 208894_at     | 2,41        |
| VCAM1    | 203868_s_at   | 3,05        |
| SCD      | 200832_s_at   | 2,6         |
| TRGV9    | 209813_x_at   | 2,82        |
| TNFRSF9  | 207536_s_at   | 2,29        |
| RAB7L1   | 218699_at     | 2,03        |
| SH2D1A   | 211209_x_at   | 2,08        |
| C13orf18 | 44790_s_at    | 5,08        |
| C16orf5  | 218183_at     | 2,36        |
| PAX5     | 221969_at     | 2,49        |
| KIF11    | 204444_at     | 3,27        |
| TARP     | 216920_s_at   | 2,86        |
| TRGC2    | 215806_x_at   | 2,71        |
| PRF1     | 214617_at     | 3,26        |
| CST7     | 210140_at     | 2,48        |
| RUVBL1   | 201614_s_at   | 2,11        |
| CD58     | 216942_s_at   | 2,13        |
| HLA-DPA1 | 211991_s_at   | 2,14        |
| TARP     | 211144_x_at   | 2,7         |
| POU2AF1  | 205267_at     | 2,11        |
| PLCG2    | 204613_at     | 2,63        |
| GTF2H5   | 213357_at     | 2,08        |
| APOBEC3F | 214995_s_at   | 2,41        |
| MPV17    | 203466_at     | 2,15        |

| Gene ID  | Affymetrix ID | Fold Change |
|----------|---------------|-------------|
| HLA-DRB1 | 209312_x_at   | 2,12        |
| SMARCAL1 | 218452_at     | 2,58        |
| ELP3     | 221094_s_at   | 2           |
| C11orf49 | 203257_s_at   | 2,2         |
| GZMK     | 206666_at     | 2,14        |
| NINJ2    | 219594_at     | 2,4         |
| CRTAM    | 206914_at     | 2,22        |
| CLIC3    | 219529_at     | 3,48        |
| HLA-DQA1 | 212671_s_at   | 3,55        |
| MED12    | 211342_x_at   | 2,13        |
| PTGDR    | 215894_at     | 2,35        |
| RALBP1   | 202844_s_at   | 2,89        |
| PVRIG    | 219812_at     | 2,14        |
| CTSC     | 201487_at     | 2,19        |
| RBM8A    | 217857_s_at   | 3,34        |
| STIP1    | 212009_s_at   | 2,13        |
| DNAJB6   | 209015_s_at   | 2,56        |
| DYNLL1   | 200703_at     | 2,16        |
| METTL7A  | 207761_s_at   | 2,2         |
| LPCAT1   | 201818_at     | 2,56        |
| PLEK     | 203470_s_at   | 2,54        |
| MYCBP    | 203360_s_at   | 2,15        |
| IDH1     | 201193_at     | 2,19        |
| OAS2     | 206553_at     | 2,4         |
| CD244    | 220307_at     | 2,43        |
| HEMK1    | 218620_s_at   | 2,33        |
| DMN      | 212730_at     | 2,05        |
| DPYSL2   | 200762_at     | 2,04        |
| CD160    | 207840_at     | 2,9         |
| KLRF1    | 220646_s_at   | 2,51        |
| CHST12   | 218927_s_at   | 2,19        |
| ARPC4    | 217818_s_at   | 2,4         |
| RAD51C   | 209849_s_at   | 2,7         |

| Gene ID  | Affymetrix ID | Fold Change |
|----------|---------------|-------------|
| GZMA     | 205488_at     | 2,44        |
| FLJ14213 | 219383_at     | 2,55        |
| ARPC5    | 211963_s_at   | 2,03        |
| M6PR     | 200900_s_at   | 2,15        |
| CCL4     | 204103_at     | 2,68        |
| ARFIP1   | 214483_s_at   | 2,24        |
| ANXA4    | 201301_s_at   | 2,91        |
| CCR5     | 206991_s_at   | 3,72        |
| FGR      | 208438_s_at   | 2,32        |
| MELK     | 204825_at     | 2,05        |
| CRIPT    | 218643_s_at   | 2,99        |
| KLRA1    | 207229_at     | 2,11        |
| ATP6V1D  | 208898_at     | 2,15        |
| RNF5     | 209111_at     | 2,07        |
| C3orf60  | 209177_at     | 2,86        |
| PTGDS    | 211748_x_at   | 3,45        |
| PLEK     | 203471_s_at   | 2,14        |
| HLA-DRA  | 210982_s_at   | 2,52        |
| ARFIP1   | 218230_at     | 3,39        |
| ST8SIA1  | 210073_at     | 2,45        |
| PIGN     | 219048_at     | 2,65        |
| STX7     | 212631_at     | 2,14        |
| RRM2     | 201890_at     | 2,8         |
| FADS2    | 202218_s_at   | 2,43        |
| ADCY9    | 204497_at     | 2,18        |
| ENSA     | 221487_s_at   | 2,04        |
| RRBP1    | 201204_s_at   | 2,25        |
| WIP1     | 213836_s_at   | 2,31        |
| APOBEC3G | 204205_at     | 2,12        |
| GOLPH3L  | 218361_at     | 3,42        |
| SMC2     | 204240_s_at   | 2,31        |
| CX3CR1   | 205898_at     | 4,06        |
| KLRK1    | 205821_at     | 2,14        |
| FASTKD1  | 219002_at     | 2,01        |
| NKG7     | 213915_at     | 2,15        |
| TKTL1    | 214183_s_at   | 2,45        |
| COL4A3   | 222073_at     | 2,06        |
| DENND2D  | 221081_s_at   | 2,27        |
| PECAM1   | 208983_s_at   | 2,25        |
| RPE      | 221770_at     | 2,23        |
| RALBP1   | 202845_s_at   | 2,01        |
| PCMT1    | 205202_at     | 2,03        |
| TAF1B    | 214690_at     | 2,11        |
| CD79B    | 205297_s_at   | 2,01        |
| PTGER2   | 206631_at     | 2,08        |
| BTN3A2   | 212613_at     | 2,45        |
| SEC23B   | 201582_at     | 2,03        |
| AOAH     | 205639_at     | 2,09        |
| SNX1     | 214531_s_at   | 2,37        |
| CD300A   | 209933_s_at   | 2,66        |

| Gene ID    | Affymetrix ID | Fold Change |
|------------|---------------|-------------|
| JAKMIP2    | 205888_s_at   | 2,16        |
| FARSA      | 216602_s_at   | 2,87        |
| SELPLG     | 209880_s_at   | 2,07        |
| ACADM      | 202502_at     | 2,08        |
| KLRD1      | 210606_x_at   | 2,49        |
| IGKC       | 221651_x_at   | 4,19        |
| KLRC2      | 206785_s_at   | 3,3         |
| ANXA4      | 201302_at     | 2,08        |
| BID        | 204493_at     | 2,08        |
| ZMYM6      | 219924_s_at   | 2,07        |
| TTC38      | 218272_at     | 3,43        |
| AQR        | 212583_at     | 2,14        |
| TNFRSF1A   | 207643_s_at   | 2,08        |
| SH3BP2     | 217257_at     | 2,19        |
| SKAP2      | 204362_at     | 2,35        |
| SLCO4C1    | 222071_s_at   | 2,36        |
| CTNNA1     | 210844_x_at   | 2,25        |
| GIMAP4     | 219243_at     | 2,75        |
| C1orf103   | 220235_s_at   | 2,09        |
| KLRD1      | 207795_s_at   | 2,28        |
| FLJ11151   | 218610_s_at   | 2,21        |
| SKAP2      | 204361_s_at   | 2,25        |
| TSPAN31    | 203227_s_at   | 2,01        |
| SEC23IP    | 216392_s_at   | 2,52        |
| NA         | 220577_at     | 2           |
| HSDL2      | 209512_at     | 2,15        |
| HLA-DQB1   | 212998_x_at   | 2,28        |
| PPP1R10    | 201702_s_at   | 2,41        |
| LPCAT4     | 40472_at      | 2,07        |
| PDE6D      | 216883_x_at   | 2,45        |
| NDUFAF1    | 204125_at     | 2,02        |
| DLGAP5     | 203764_at     | 2,32        |
| IGL@       | 215121_x_at   | 2,29        |
| ALDH5A1    | 203608_at     | 2,08        |
|            |               |             |
|            |               |             |
| PPBP       | 214146_s_at   | 0,15        |
| NA         | 215392_at     | 0,44        |
| MEIS3P1    | 214077_x_at   | 0,5         |
| IRS2       | 209185_s_at   | 0,34        |
| IRS2       | 209184_s_at   | 0,41        |
| PGAP1      | 220576_at     | 0,46        |
| BACH1      | 204194_at     | 0,48        |
| SCML1      | 218793_s_at   | 0,27        |
| CSGALNACT1 | 219049_at     | 0,5         |
| FBXL11     | 208989_s_at   | 0,47        |
| SGK1       | 201739_at     | 0,26        |
| NET1       | 201830_s_at   | 0,44        |
| ZBTB10     | 219312_s_at   | 0,38        |

**Table S4. The differentially expressed T-cell genes were further analyzed for associations with biological processes as defined in the Gene Ontology (GO) data base.**

| <b>GOBPID</b> | <b>Pvalue</b> | <b>Count</b> | <b>Size</b> | <b>Term</b>                                                                               |
|---------------|---------------|--------------|-------------|-------------------------------------------------------------------------------------------|
| GO:0006955    | 5,57E-08      | 22           | 289         | immune response                                                                           |
| GO:0002376    | 1,18E-06      | 24           | 401         | immune system process                                                                     |
| GO:0002504    | 2,28E-06      | 5            | 12          | antigen processing and presentation of peptide or polysaccharide antigen via MHC class II |
| GO:0050896    | 4,48E-06      | 41           | 1018        | response to stimulus                                                                      |
| GO:0031347    | 4,46E-05      | 6            | 33          | regulation of defense response                                                            |
| GO:0006968    | 8,76E-05      | 6            | 37          | cellular defense response                                                                 |
| GO:0048583    | 0,00013923    | 8            | 76          | regulation of response to stimulus                                                        |
| GO:0019882    | 0,00015853    | 6            | 41          | antigen processing and presentation                                                       |
| GO:0006952    | 0,00040894    | 13           | 216         | defense response                                                                          |
| GO:0002230    | 0,00041225    | 2            | 2           | positive regulation of defense response to virus by host                                  |
| GO:0006410    | 0,00041225    | 2            | 2           | transcription, RNA-dependent                                                              |
| GO:0045869    | 0,00041225    | 2            | 2           | negative regulation of retroviral genome replication                                      |

## Supplementary figure

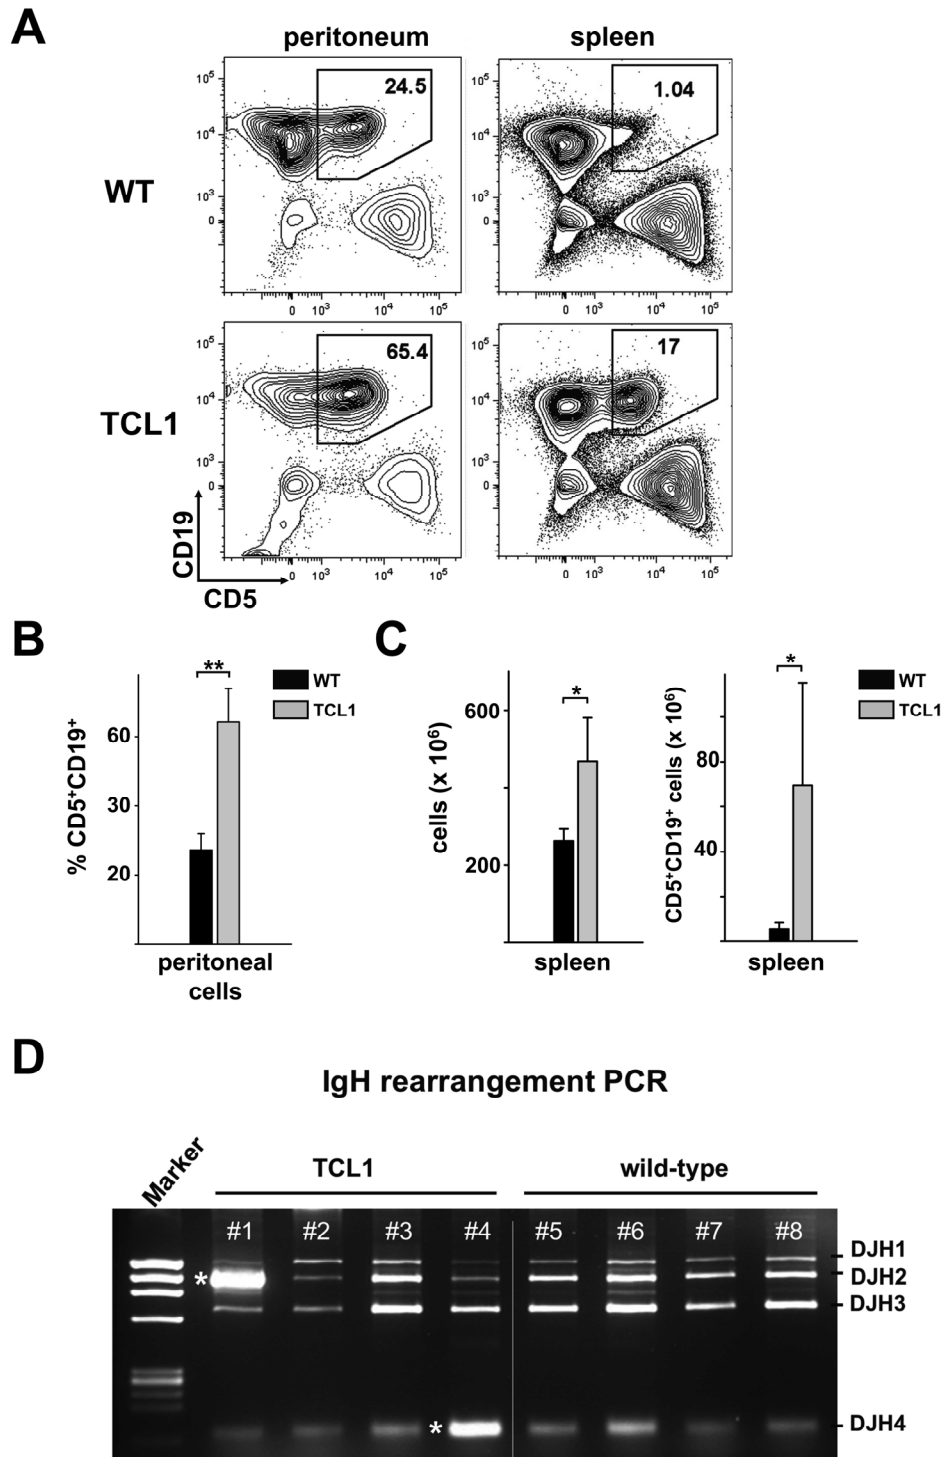

**Figure S1. Emergence of CLL-like disease in 7-month-old TCL1 transgenic mice.** (A) Expansion of the peritoneal and splenic CD5<sup>+</sup>CD19<sup>+</sup> B-cell compartment in TCL1 transgenic mice compared to wild-type controls. Representative plots are displayed. (B) The percentage of peritoneal CD5<sup>+</sup>CD19<sup>+</sup> cells (gated as shown in A) of TCL1 transgenic (n=4) compared to wild-type mice (n=6) is significantly increased. (C) Quantification of total splenic cells and CD5<sup>+</sup>CD19<sup>+</sup> cells per spleen. TCL1

transgenic mice (n=4) were compared to wild-type control mice (n=6). (D) In parallel to the flow cytometric analysis we isolated DNA from splenocytes and carried out a previously published clonality PCR [1-3]. IgH locus rearrangement converges DSF and J<sub>H</sub>4 primer annealing sites. DSF is a degenerate forward Primer specific for recombination signal sequences upstream of D<sub>H</sub> Segments (DSF; sequence AGG GAT CCT TGT GAA GGG ATC TAC TAC TGT G). J<sub>H</sub>4 is a reverse primer specific for the J<sub>H</sub>4 segment (J<sub>H</sub>4, AAA GAC CTG CAG AGG CCA TTC TTA CC). In normal polyclonal B-cell populations this PCR amplifies 4 different rearranged DJ<sub>H</sub> segments. In oligoclonal or monoclonal populations preferential amplification or loss of segments can occur. Asterisks on the displayed gel image depict preferentially amplified DJ<sub>H</sub> segments. The gel image demonstrates emerging clones in TCL1 spleens #1 and #4.

## Supplementary references

1. Sollbach AE, Wu GE (1995) Inversions produced during V(D)J rearrangement at IgH, the immunoglobulin heavy-chain locus. *Mol Cell Biol* 15(2): 671-681
2. Kawamoto H, Ikawa T, Ohmura K, Fujimoto S, Katsura Y (2000) T cell progenitors emerge earlier than B cell progenitors in the murine fetal liver. *Immunity* 12(4): 441-450
3. Chang Y, Paige CJ, Wu GE (1992) Enumeration and characterization of DJH structures in mouse fetal liver. *EMBO J* 11(5): 1891-1899
